# Supplementary material for: Supramolecular electron donor–acceptor complexes formed by perylene diimide derivative and conjugated phenazines
Source: Royal Society of Chemistry journal article supplement (doi:10.1039/c4nj01083c), 2014-01-01
Supplement: c4nj01083c1.pdf [file c4nj01083c1.pdf]

Electronic Supplementary Material (ESI) for New Journal of Chemistry.

This journal is © The Royal Society of Chemistry and the Centre National de la Recherche  
Scientifique 2014

Supplementary Information

## **Supramolecular Electron Donor-Acceptor Complexes Formed by Perylene Diimide Derivative and Conjugated Phenazines**

Yunyan Gao, <sup>\*a</sup> Huizhen Li,<sup>a</sup> Shiwei Yin, <sup>\*b</sup> Guixia Liu,<sup>a</sup> Lu Cao,<sup>a</sup> Yi Li,<sup>c</sup> Xuesong Wang,<sup>c</sup>

Zhize Ou, <sup>\*a</sup> Xin Wang<sup>a</sup>

<sup>a</sup>*The Key Laboratory of Space Applied Physics and Chemistry, Ministry of Education,  
Department of Applied Chemistry, School of Science, Northwestern Polytechnical University,  
Xi'an, 710072, People's Republic of China;*

<sup>b</sup>*Key Laboratory for Macromolecular Science of Shaanxi Province, School of Chemistry &  
Chemical Engineering, Shaanxi Normal University, Xi'an City, People's Republic of China,  
710062;*

<sup>c</sup>*Technical Institute of Physics and Chemistry, Chinese Academy of Sciences, Beijing, 100190,  
People's Republic of China*

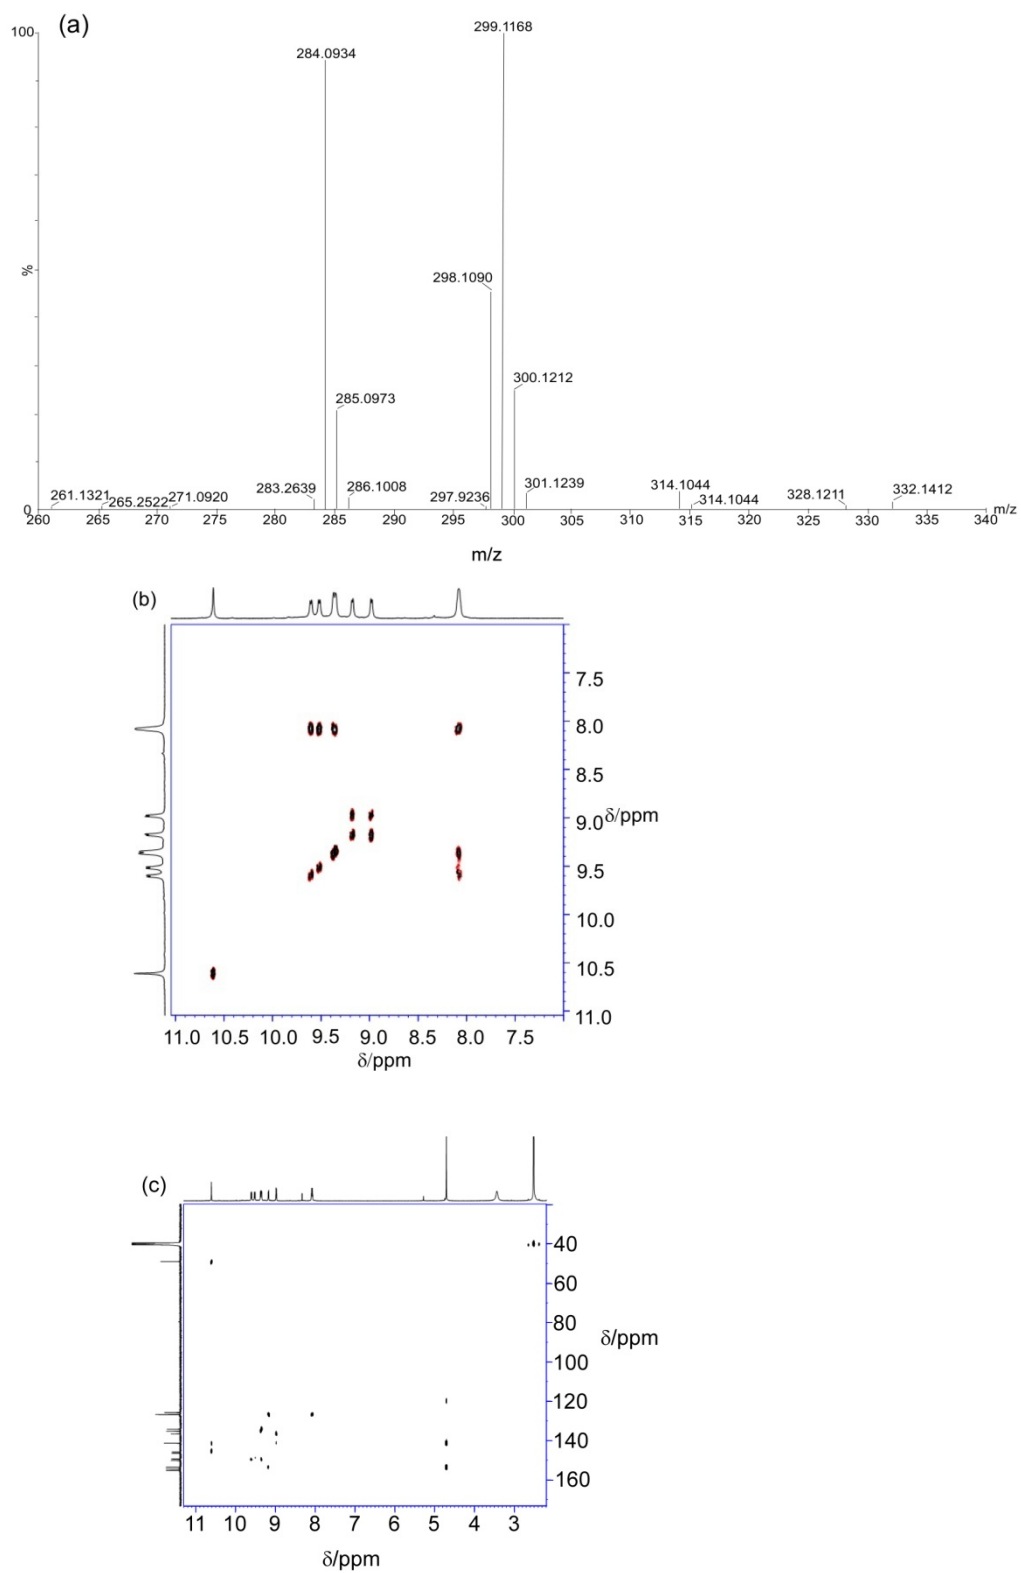

**Fig. S1** (a) ESI-HRMS, (b) H-H cosy NMR and (c) HMBC NMR spectra of **3a**.

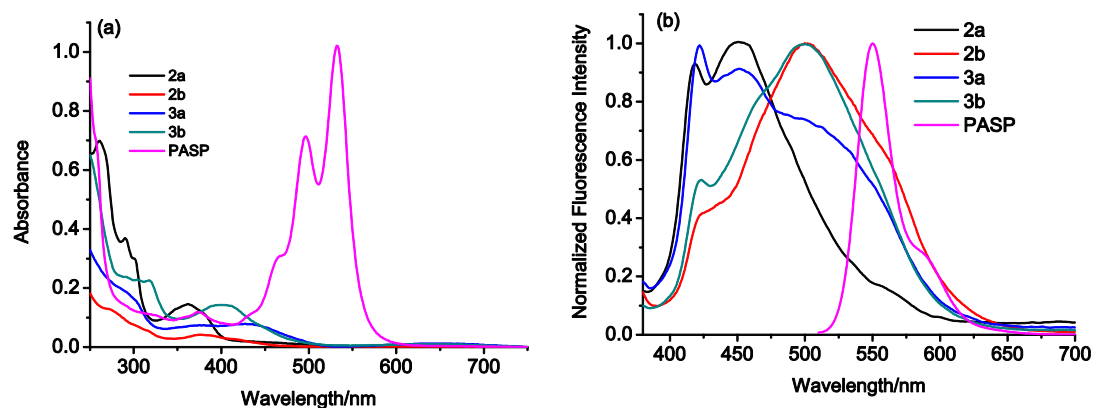

**Fig. S2** (a) Absorption and (b) normalized fluorescence emission spectra of **2a**, **3a**, **3b** and PASP in Tris-HCl (10 mM, pH 7.4) ( $\lambda_{\text{ex}} = 365$  nm).  $[\mathbf{2a}] = [\mathbf{3a}] = [\mathbf{3b}] = [\mathbf{PASP}] = 20 \mu\text{M}$ .

**Table S1** Photophysical data of PASP and phenazine derivatives in Tris-HCl buffer (10 mM, pH 7.4)

| Sample    | $\lambda_{\text{abs}}$ (nm) | $\varepsilon$ ( $\times 10^4 \text{ L.mol}^{-1}.\text{cm}^{-1}$ ) | $\lambda_{\text{em(max)}}$ (nm) | $\Phi_{\text{F}}^{\text{a}}$ |
|-----------|-----------------------------|-------------------------------------------------------------------|---------------------------------|------------------------------|
| PASP      | 465, 496, 532               | 1.65, 4.25, 6.60                                                  | 550                             | 0.98                         |
| <b>2a</b> | 261, 290, 301, 362          | 3.49, 1.84, 1.5, 0.75                                             | 455                             | 0.007                        |
| <b>2b</b> | 271, 376                    | 0.65, 0.02                                                        | 503                             | 0.10                         |
| <b>3a</b> | 301, 374, 428, 649          | 0.81, 0.37, 0.40, 0.06                                            | 461                             | 0.014                        |
| <b>3b</b> | 248, 318, 402, 637          | 3.29, 1.13, 0.72, 0.05                                            | 501                             | 0.016                        |

<sup>a</sup> Rhodamine 6G in methanol was used as standard with a fluorescence quantum yield of  $\Phi_{\text{F}} = 0.94$ .<sup>1</sup>

#### Reference

1. W. Holzer, H. Gratz, T. Schmitt, A. Penzkofer, A. Costela, I. Garcia-Moreno, R. Sastre and F. J. Duarte, *Chem. Phys.*, 2000, **256**, 125-136.
